# Supplementary material for: Organosulfate Produced from Consumption of SO 3 Speeds up Sulfuric Acid-Dimethylamine Atmospheric Nucleation
Source: Copernicus journal article supplement (doi:10.5194/egusphere-2023-1649), 2023-08-09
Supplement: Supplementary file 1 [file egusphere-2023-1649-supplement.pdf]

# 1 **Organosulfate Produced from Consumption of SO<sub>3</sub> Speeds up** 2 **Sulfuric Acid-Dimethylamine Atmospheric Nucleation**

3  
4 *Xiaomeng Zhang<sup>a</sup>, Yongjian Lian<sup>a</sup>, Shendong Tan<sup>a</sup> and Shi Yin<sup>\*a</sup>*

5 <sup>a</sup> MOE & Guangdong Province Key Laboratory of Laser Life Science & Institute of Laser Life Science,  
6 Guangzhou Key Laboratory of Spectral Analysis and Functional Probes, College of Biophotonics, South  
7 China Normal University, Guangzhou 510631, P. R. China

8 AUTHOR INFORMATION

### 9 **Corresponding Author**

10 \*Shi Yin, E-mail: [yinshi@m.scnu.edu.cn](mailto:yinshi@m.scnu.edu.cn)

## Supporting information

---

|    |                                                                                                       |     |
|----|-------------------------------------------------------------------------------------------------------|-----|
| 12 | <b>Table of contents</b>                                                                              |     |
| 13 | 1. The concentration of glycolic acid sulfate (GAS) and glycolic acid sulfuric anhydride (GASA) ..... | S3  |
| 14 | 2. Selection of simulated box and boundary clusters.....                                              | S4  |
| 15 | 3. Figure S1.....                                                                                     | S5  |
| 16 | 4. Figure S2.....                                                                                     | S6  |
| 17 | 5. Figure S3.....                                                                                     | S7  |
| 18 | 6. Figure S4.....                                                                                     | S8  |
| 19 | 7. Figure S5.....                                                                                     | S9  |
| 20 | 8. Figure S6.....                                                                                     | S11 |
| 21 | 9. Table S1.....                                                                                      | S14 |
| 22 | 10. Table S2.....                                                                                     | S15 |
| 23 | 11. Table S3.....                                                                                     | S16 |
| 24 | 12. Reference .....                                                                                   | S22 |
| 25 |                                                                                                       |     |
| 26 |                                                                                                       |     |

## Supporting information

---

### The concentration of glycolic acid sulfate (GAS) and glycolic acid sulfuric anhydride (GASA)

The formation of GAS and GASA can be described by following two reactions, respectively.

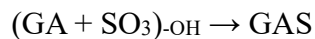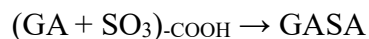

The equilibrium constant  $K_{(GA + SO_3)_{-OH}}$  for the formation of GAS and  $K_{(GA + SO_3)_{-COOH}}$  for the formation of GASA are

$$K_{(GA + SO_3)_{-OH}} = \frac{[GAS]}{[GA][SO_3]} = e^{\frac{-\Delta G}{RT}}$$

$$K_{(GA + SO_3)_{-COOH}} = \frac{[GASA]}{[GA][SO_3]} = e^{\frac{-\Delta G}{RT}}$$

And the equilibrium concentration of GAS and GASA can be roughly estimated theoretically using the following expressions:

$$[GAS] = K_{(GA + SO_3)_{-OH}} [GA][SO_3]$$

$$[GASA] = K_{(GA + SO_3)_{-COOH}} [GA][SO_3]$$

where  $K_{(GA + SO_3)_{-OH}}$  and  $K_{(GA + SO_3)_{-COOH}}$  are equal to the equilibrium constants from the formation Gibbs energies of the GAS and GASA, respectively.  $[GA]$  and  $[SO_3]$  are the concentration of GA and  $SO_3$  monomer, respectively. We use the reactant concentrations of  $[GA] = 1.11 \times 10^7$ - $2.72 \times 10^9$  molecules  $cm^{-3}$ ,  $[SO_3] = 10^5$  molecules  $cm^{-3}$  according to the values of some field observations<sup>1-4</sup>. Based on the above equations, the estimated concentration of the reaction product, GAS, is about  $2.14 \times 10^3$ - $5.24 \times 10^5$  molecules  $cm^{-3}$ , and GASA is about  $2.30 \times 10^{-6}$ - $5.62 \times 10^{-4}$  molecules  $cm^{-3}$ . Thus, a range of concentration for GAS, from  $10^3$  to  $10^5$  molecules  $cm^{-3}$  as shown in [Table S1](#), is selected for the discussion in this work.

## Supporting information

---

### 49 Selection of simulated box and boundary clusters

50 For H<sub>2</sub>SO<sub>4</sub>-DMA system, “3 × 3” box has always been adopted in previous studies<sup>5</sup>. The box for the  
51 H<sub>2</sub>SO<sub>4</sub>-DMA-based system is set to the size of “3 × 3” to contain the (GA)<sub>x</sub>(SA)<sub>y</sub>(DMA)<sub>z</sub>,  
52 (GAS)<sub>x</sub>(SA)<sub>y</sub>(DMA)<sub>z</sub>, and (GAS)<sub>x</sub>(SA)<sub>y</sub>(DMA)<sub>z</sub> (0 ≤ z ≤ x + y ≤ 3) clusters.

53 In the process of cluster growth, the stability of cluster can be judged by the competition between  
54 evaporation into smaller clusters or collision. The collision rate constant of a cluster with acid or base  
55 monomer is of the order of 10<sup>-10</sup> cm<sup>3</sup> s<sup>-1</sup>, and the collision rate can be considered to be about 10<sup>-2</sup> s<sup>-1</sup> under the  
56 condition of base/acid monomers at ppt level. Thus, the cluster can be considered to be stable enough when  
57 the collision rate is higher than that of evaporation, and a given cluster can be deemed as stable enough for  
58 further growth when the evaporation rate is lower than 10<sup>-3</sup> s<sup>-1</sup>.

59 The boundary clusters are allowed to leave the simulation box for further growth, which means the  
60 boundary clusters are needed to be stable enough and have the potential to continue growing. Furthermore,  
61 generally speaking, the clusters with approximately equal numbers of acidic molecules and base molecules or  
62 number of acidic molecules one greater than that of base molecules are assumed to have the potential for  
63 further growth. Hence, only clusters that satisfy the above conditions are calculated.

64 As shown in Figure S3, the evaporation rates for all glycolic acid (GA)-involved clusters has been  
65 predicted to be higher than 10<sup>1</sup> s<sup>-1</sup>. Therefore, the boundary clusters are (SA)<sub>4</sub>(SA)<sub>3</sub> and (SA)<sub>4</sub>(SA)<sub>4</sub> clusters  
66 for GA-SA-DMA system. As for GAS-SA-DMA system, the (GAS)<sub>3</sub>(DMA)<sub>3</sub>, (GAS)<sub>2</sub>(DMA)<sub>2</sub>, and  
67 (GAS)<sub>1</sub>(SA)<sub>2</sub>(DMA)<sub>3</sub> clusters are stable enough against evaporation. Thus, (GAS)<sub>4</sub>(DMA)<sub>3</sub>, (GAS)<sub>4</sub>(DMA)<sub>4</sub>,  
68 (GAS)<sub>2</sub>(SA)<sub>2</sub>(DMA)<sub>3</sub>, (GAS)<sub>2</sub>(SA)<sub>2</sub>(DMA)<sub>4</sub>, (GAS)<sub>3</sub>(SA)<sub>1</sub>(DMA)<sub>3</sub>, (GAS)<sub>3</sub>(SA)<sub>1</sub>(DMA)<sub>4</sub>,  
69 (GAS)<sub>1</sub>(SA)<sub>3</sub>(DMA)<sub>3</sub>, (GAS)<sub>1</sub>(SA)<sub>3</sub>(DMA)<sub>4</sub>, (SA)<sub>4</sub>(SA)<sub>3</sub> and (SA)<sub>4</sub>(SA)<sub>4</sub> clusters are acting as boundary  
70 clusters for GSA-SA-DMA system. Similarly, the (GASA)<sub>4</sub>(DMA)<sub>3</sub>, (GASA)<sub>4</sub>(DMA)<sub>4</sub>,  
71 (GASA)<sub>2</sub>(SA)<sub>2</sub>(DMA)<sub>3</sub>, (GASA)<sub>2</sub>(SA)<sub>2</sub>(DMA)<sub>4</sub>, (GASA)<sub>3</sub>(SA)<sub>1</sub>(DMA)<sub>3</sub>, (GASA)<sub>3</sub>(SA)<sub>1</sub>(DMA)<sub>4</sub>,  
72 (GASA)<sub>1</sub>(SA)<sub>3</sub>(DMA)<sub>3</sub>, (GASA)<sub>1</sub>(SA)<sub>3</sub>(DMA)<sub>4</sub>, (SA)<sub>4</sub>(SA)<sub>3</sub> and (SA)<sub>4</sub>(SA)<sub>4</sub> clusters are defined as boundary  
73 clusters for GASA-SA-DMA system for the reason that (GASA)<sub>3</sub>(DMA)<sub>3</sub>, (GASA)<sub>2</sub>(DMA)<sub>2</sub>, and  
74 (GASA)<sub>1</sub>(SA)<sub>2</sub>(DMA)<sub>3</sub> clusters are stable enough against evaporation.

## Supporting information

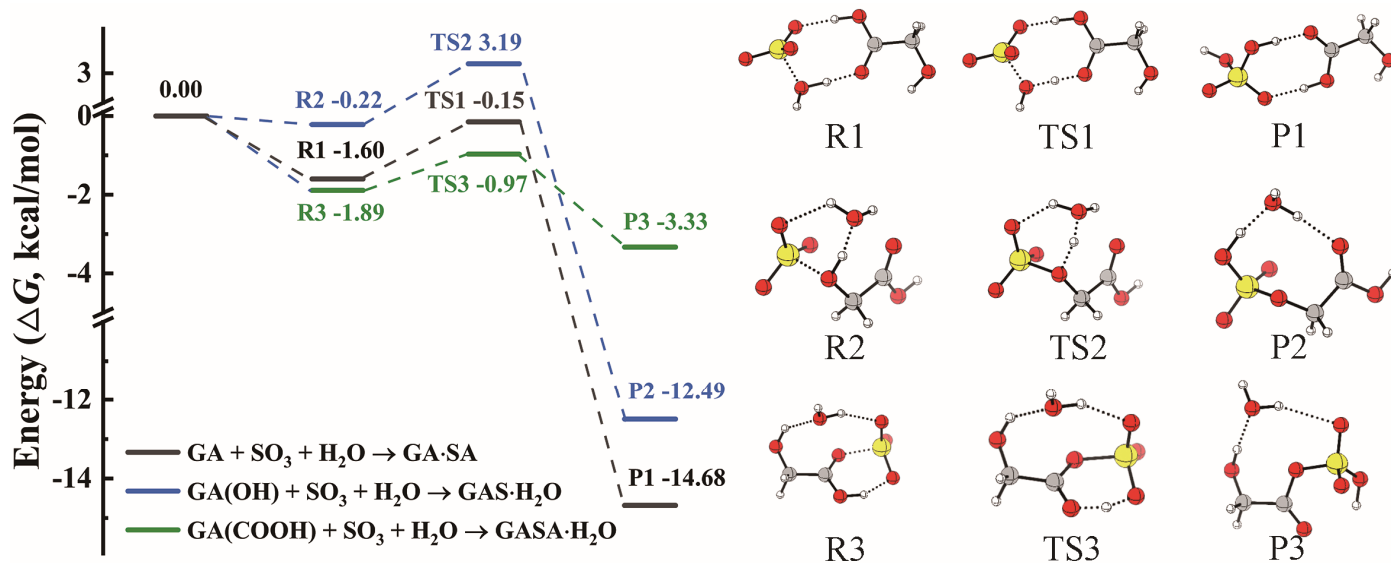

Figure S1. Potential energy surfaces at the DLPNO-CCSD(T)/aug-cc-pVTZ//M06-2X/6-311++G(3df,3pd) level of theory in units of kcal mol<sup>-1</sup> (at 298 K, 1atm) for the gas-phase reaction of GA, SO<sub>3</sub> and H<sub>2</sub>O. The red line represents the pathway through SO<sub>3</sub> attacking the -OH group of GA with H<sub>2</sub>O as a catalyst; the blue one represents the SO<sub>3</sub> attacking the -COOH group of GA pathway with H<sub>2</sub>O as a catalyst; and black one represents the pathway to form H<sub>2</sub>SO<sub>4</sub> with as a catalyst. R, TS, and P refer to pre-reaction complex, transition state, and product, respectively. Hydrogen, carbon, oxygen, and sulfur atoms are represented by white, gray, red, and yellow spheres, respectively.

### Related discussions

The -COOH group of GA and -S=O from SO<sub>3</sub> can form six-membered ring in transition state rather than closed four-membered ring. Meanwhile, according to the Electrostatic potential (ESP) on molecular van der Waals (vdW) surface of GA and SO<sub>3</sub> molecules from our previous study,<sup>6</sup> the sulfur atom in the SO<sub>3</sub> molecule possesses more positive ESP and the oxygen atoms of -COOH/-OH group possesses more negative ESP, making both of the two pathways for GA-SO<sub>3</sub> reaction feasible to occur. Also, the oxygen atoms of SO<sub>3</sub> molecule possess relatively negative ESP, which could interact with the hydrogen atoms of -COOH/-OH group. Therefore, the gas-phase reaction between GA and SO<sub>3</sub> is feasible to occur. Furthermore, the SO<sub>3</sub>-H<sub>2</sub>O reaction, which is commonly recognized as important loss process of SO<sub>3</sub>, could be catalyzed by GA. Although H<sub>2</sub>O will be dominant sink pathway for SO<sub>3</sub>, GA-SO<sub>3</sub> can be comparable to that of SO<sub>3</sub>-H<sub>2</sub>O in highly polluted areas with relatively dry and cold conditions. The gaseous concentration of H<sub>2</sub>O is drastically reduced at lower temperature and dry condition.<sup>7</sup> Hence, the GA-SO<sub>3</sub> reaction may compete with the hydration reaction of SO<sub>3</sub>.

## Supporting information

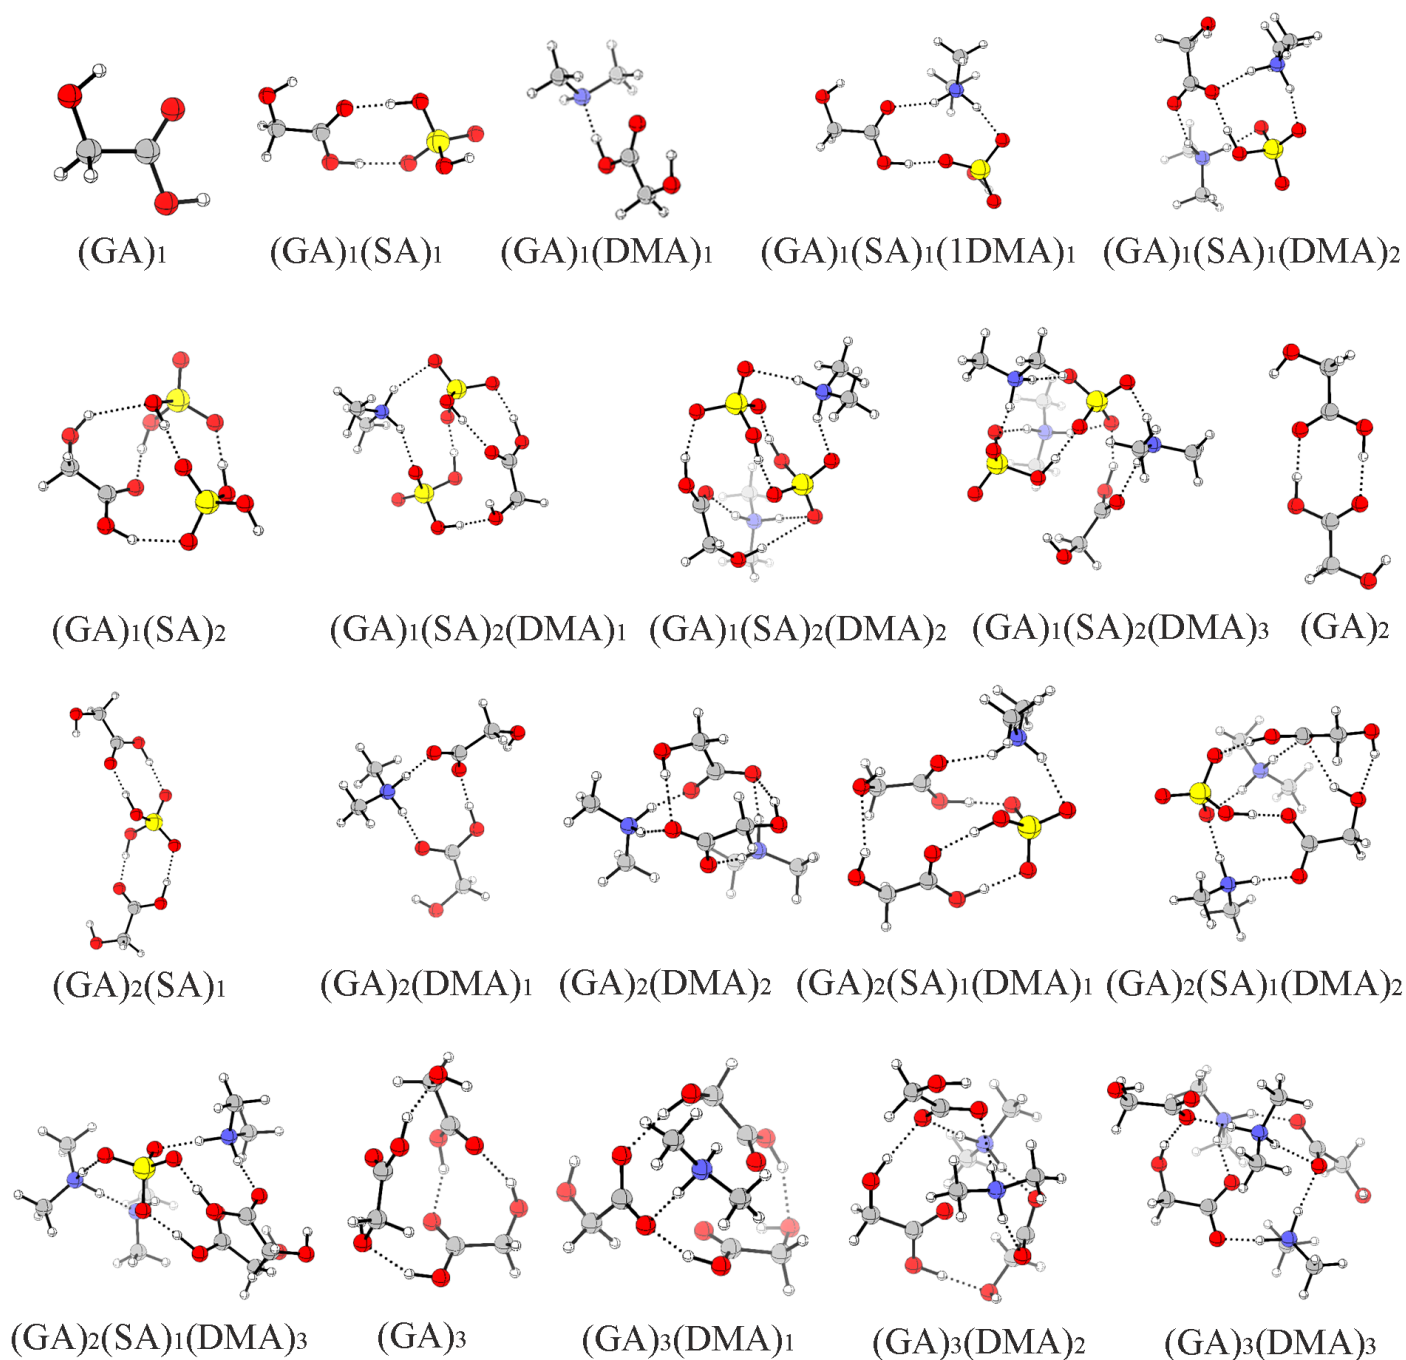

Figure S2. Identified lowest free energy structures of the  $(GA)_x(SA)_y(DMA)_z$  ( $0 \leq z \leq x + y \leq 3$ ) clusters at the DLPNO-CCSD(T)/aug-cc-pVTZ//M06-2X/6-311++G(3df,3pd) level of theory. The white, gray, red, and yellow balls represent hydrogen, carbon, oxygen, and sulfur atoms, respectively. Dashed black lines indicate hydrogen bonds.

## Supporting information

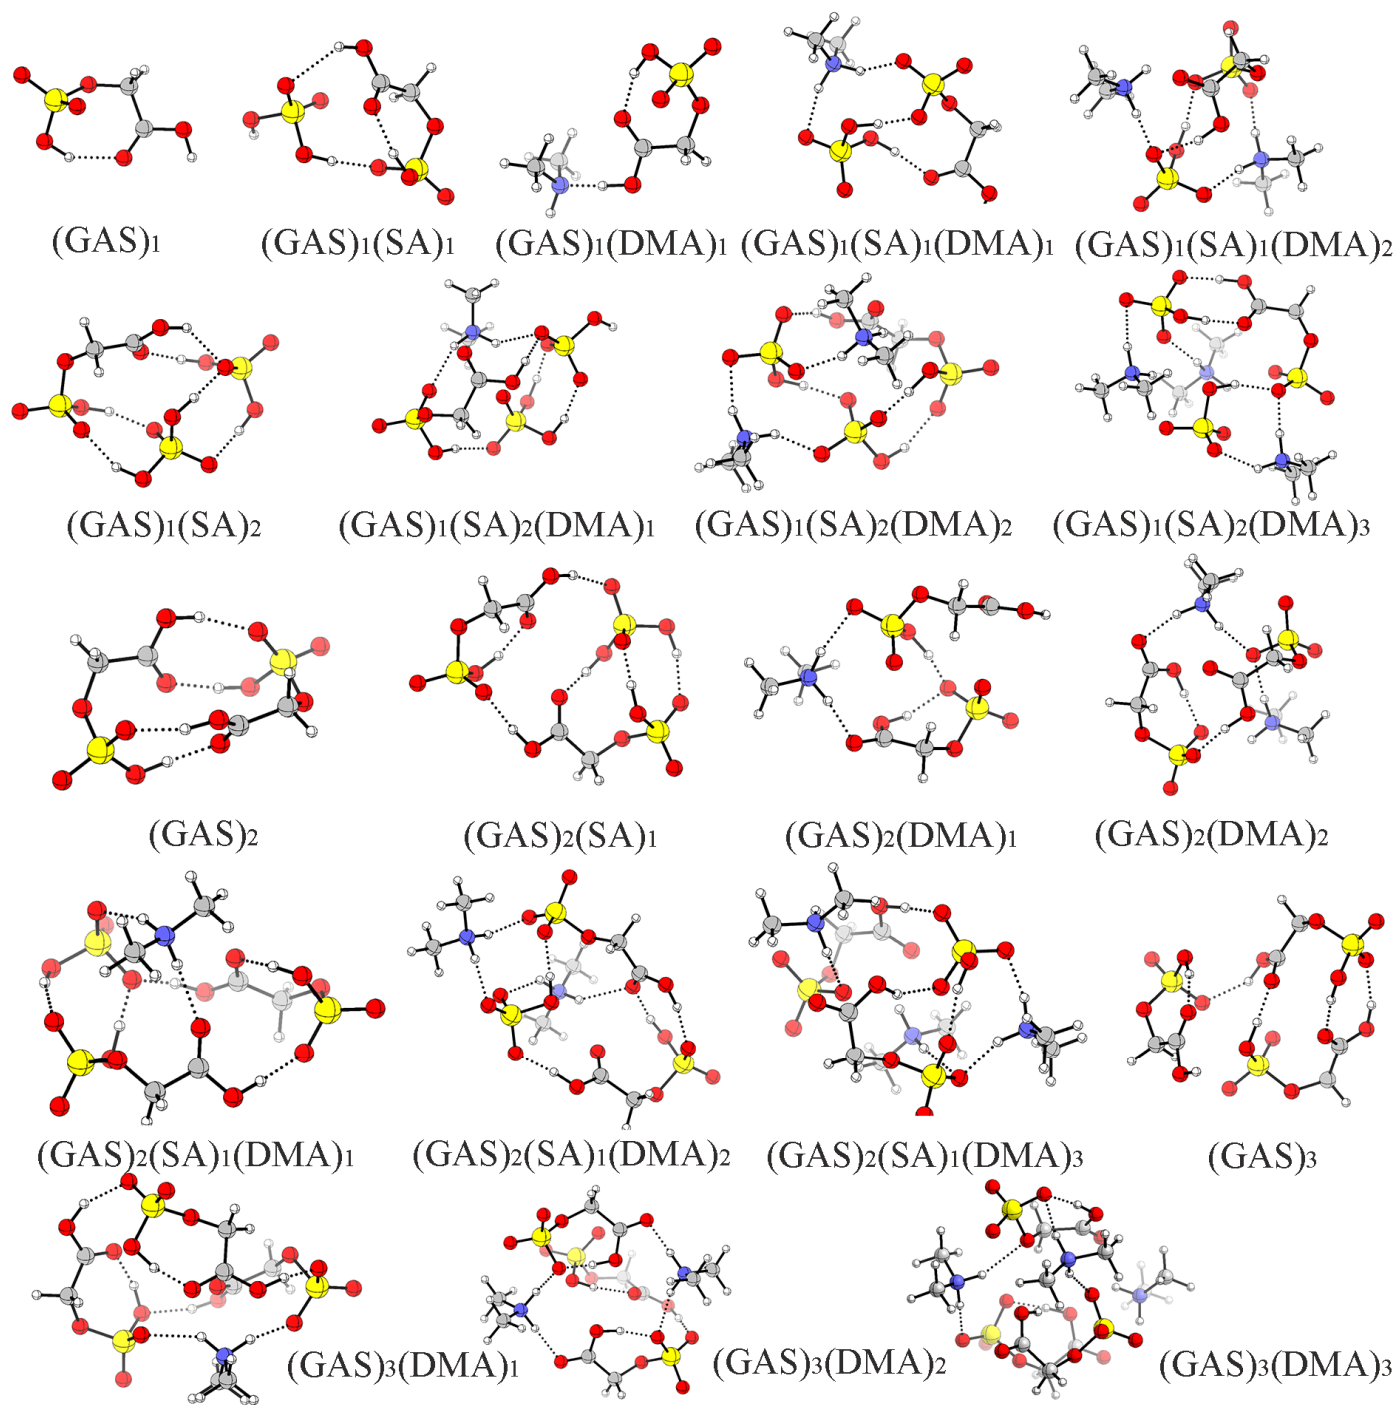

103

104

105

106

107

108

109

Figure S3. Identified lowest free energy structures of the  $(\text{GAS})_x(\text{SA})_y(\text{DMA})_z$  ( $0 \leq z \leq x + y \leq 3$ ) clusters at the DLPNO-CCSD(T)/aug-cc-pVTZ//M06-2X/6-311++G(3df,3pd) level of theory. The white, gray, red, and yellow balls represent hydrogen, carbon, oxygen, and sulfur atoms, respectively. Dashed black lines indicate hydrogen bonds.

## Supporting information

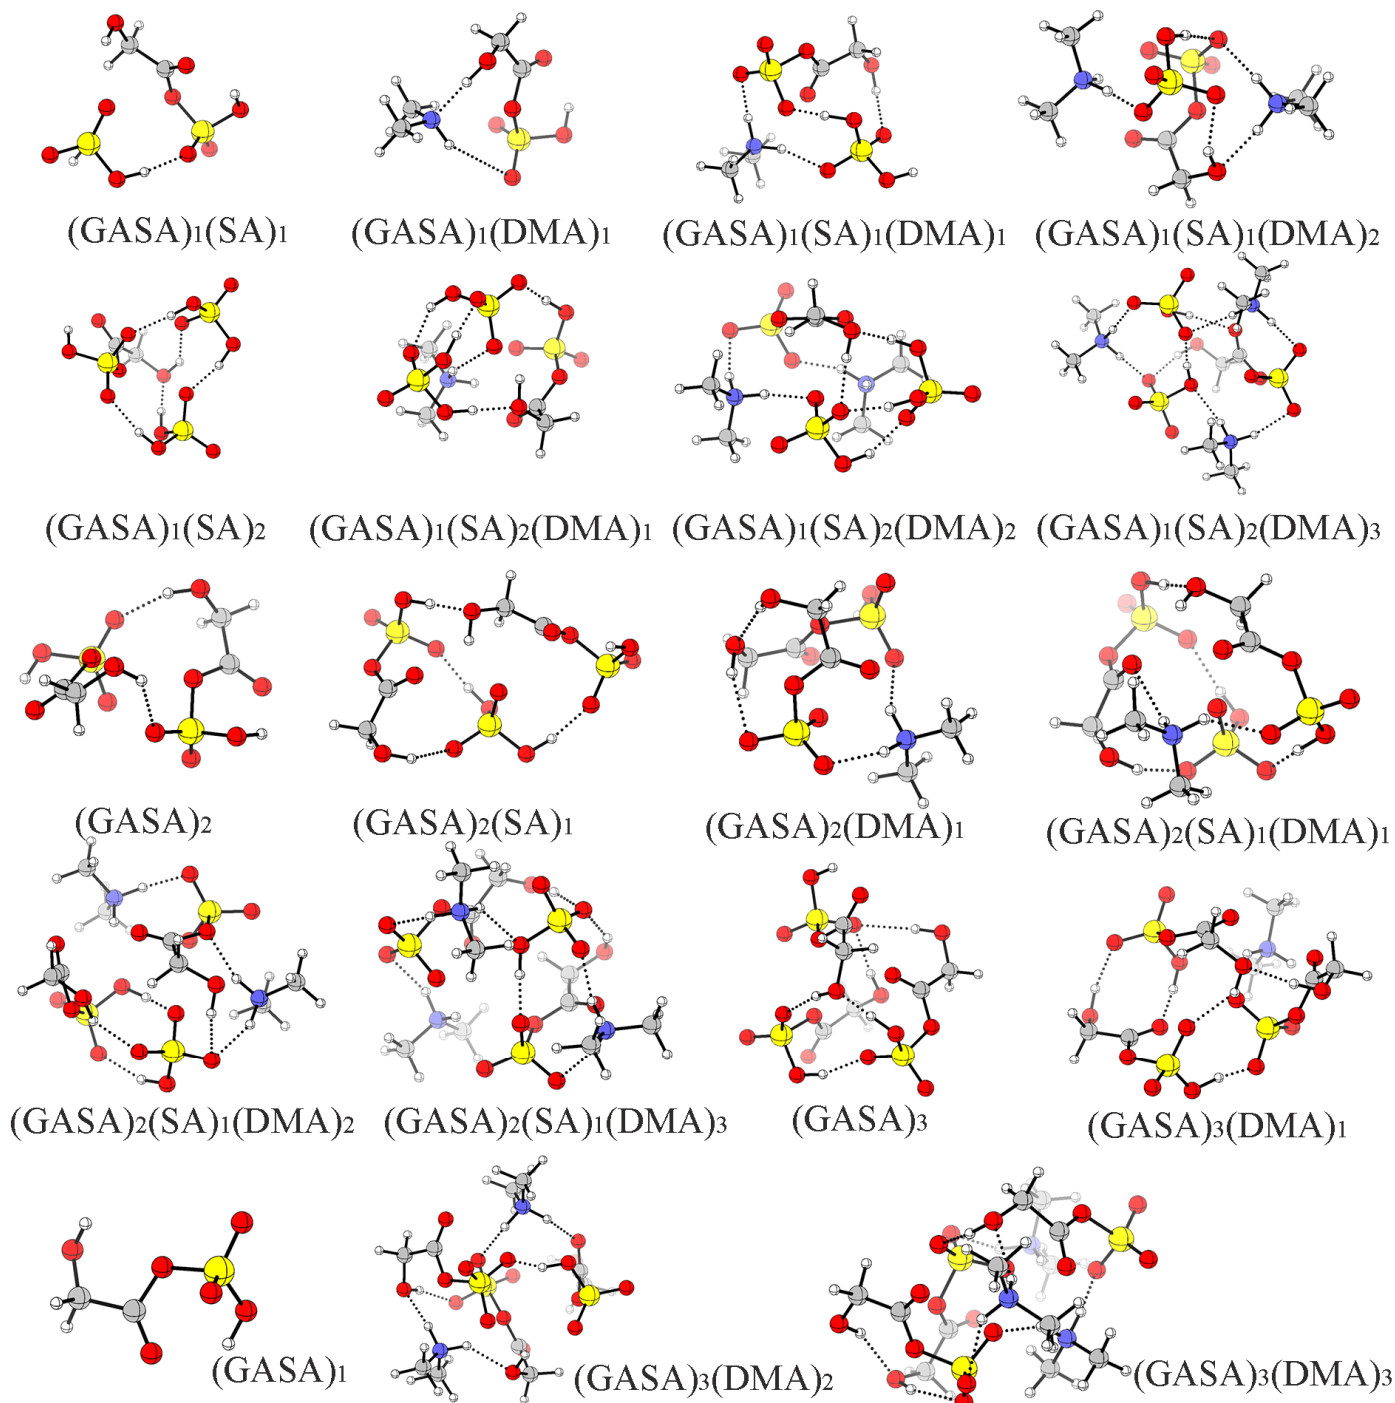

110

111

112

113

114

115

Figure S4. Identified lowest free energy structures of the  $(\text{GASA})_x(\text{SA})_y(\text{DMA})_z$  ( $0 \leq z \leq x + y \leq 3$ ) clusters at the DLPNO-CCSD(T)/aug-cc-pVTZ//M06-2X/6-311++G(3df,3pd) level of theory. The white, gray, red, and yellow balls represent hydrogen, carbon, oxygen, and sulfur atoms, respectively. Dashed black lines indicate hydrogen bonds.



# Supporting information

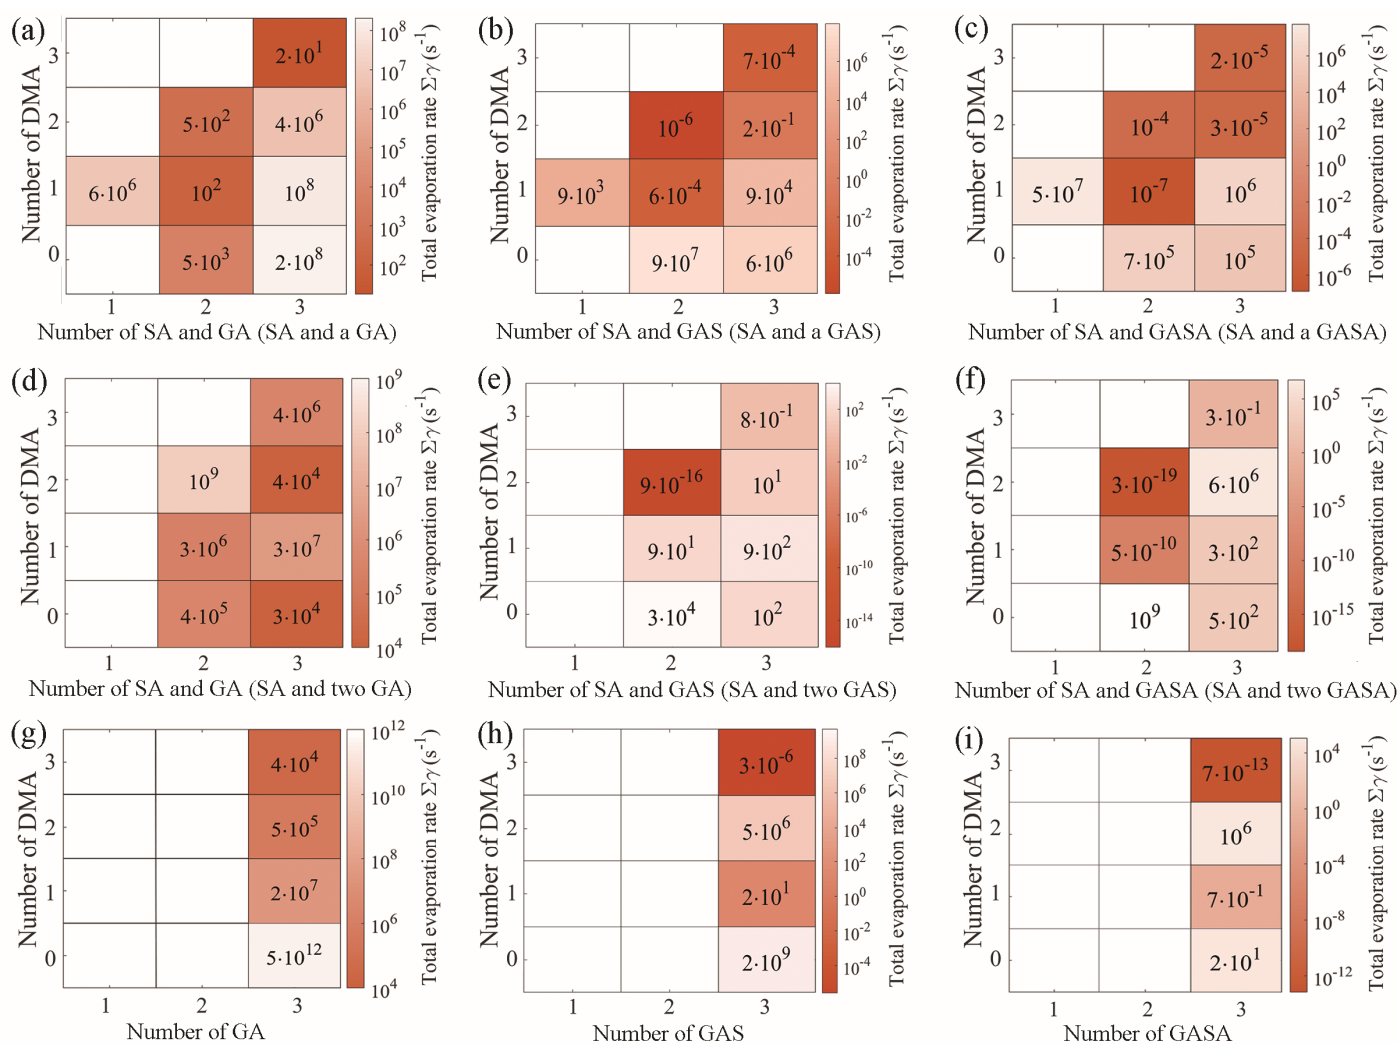

116

117 Figure S5. The evaporation rates of (GA)<sub>x</sub>(SA)<sub>y</sub>(DMA)<sub>z</sub> clusters ( $1 \leq z \leq x + y \leq 3$ ) (a, d, g; left panel),  
 118 (GAS)<sub>x</sub>(SA)<sub>y</sub>(DMA)<sub>z</sub> clusters ( $1 \leq z \leq x + y \leq 3$ ) (b, e, h; center panel), and (GASA)<sub>x</sub>(SA)<sub>y</sub>(DMA)<sub>z</sub> clusters ( $1$   
 119  $\leq z \leq x + y \leq 3$ ) (c, f, i; right panel) at 278 K.

## 120 Related discussions

121 The evaporation rates of the clusters in the GA-SA-DMA system, GAS-SA-DMA system and the GASA-  
 122 SA-DMA system at 278 K are shown in Figure S5. As can be seen in Figure S5, the evaporation rates for the  
 123 GA-SA-DMA clusters ((GA)<sub>1</sub>(SA)<sub>1</sub>(DMA)<sub>2</sub>, (GA)<sub>1</sub>(SA)<sub>2</sub>(DMA)<sub>3</sub>, (GA)<sub>2</sub>(DMA)<sub>2</sub>, (GA)<sub>2</sub>(SA)<sub>1</sub>(DMA)<sub>3</sub>,  
 124 (GA)<sub>3</sub>(DMA)<sub>3</sub>) along the diagonal line of the grid are much higher than those of corresponding GAS-SA-  
 125 DMA and GASA-SA-DMA clusters, with a range from  $10^1$  to  $10^9$  s<sup>-1</sup> in comparison to those of  $10^{-1}$  to  $10^{-19}$  s<sup>-1</sup>.  
 126 Furthermore, the evaporation of one DMA molecule or DMA involved small clusters (such as (GA)<sub>1</sub>(DMA)<sub>1</sub>,  
 127 (SA)<sub>1</sub>(DMA)<sub>1</sub>, (GAS)<sub>1</sub>(DMA)<sub>1</sub>) was the main degradation pathway for clusters with the equal number of

## Supporting information

---

128 acidic and base molecules, whereas the acidic monomer evaporation is dominant for clusters, in which the  
129 number of acidic molecules (GA, GAS, GASA and SA) is more than that of base molecules (DMA) (Table  
130 S3). Generally, clusters with low evaporation rates ( $\leq 10^{-4} \text{ s}^{-1}$ ) can be deemed as stable against evaporation,  
131 and most of the GAS-SA-DMA as well as GASA-SA-DMA clusters have lower evaporation rates than the  
132 corresponding GA-SA-DMA clusters, suggesting that the products (GAS/GASA)-involved clusters are more  
133 stable than the reactant (GA)-involved clusters. Therefore, we can conclude that GAS/GASA can form more  
134 stable clusters with SA-DMA than GA at the same size of acid and base molecules within all of the considered  
135 clusters.

136

# Supporting information

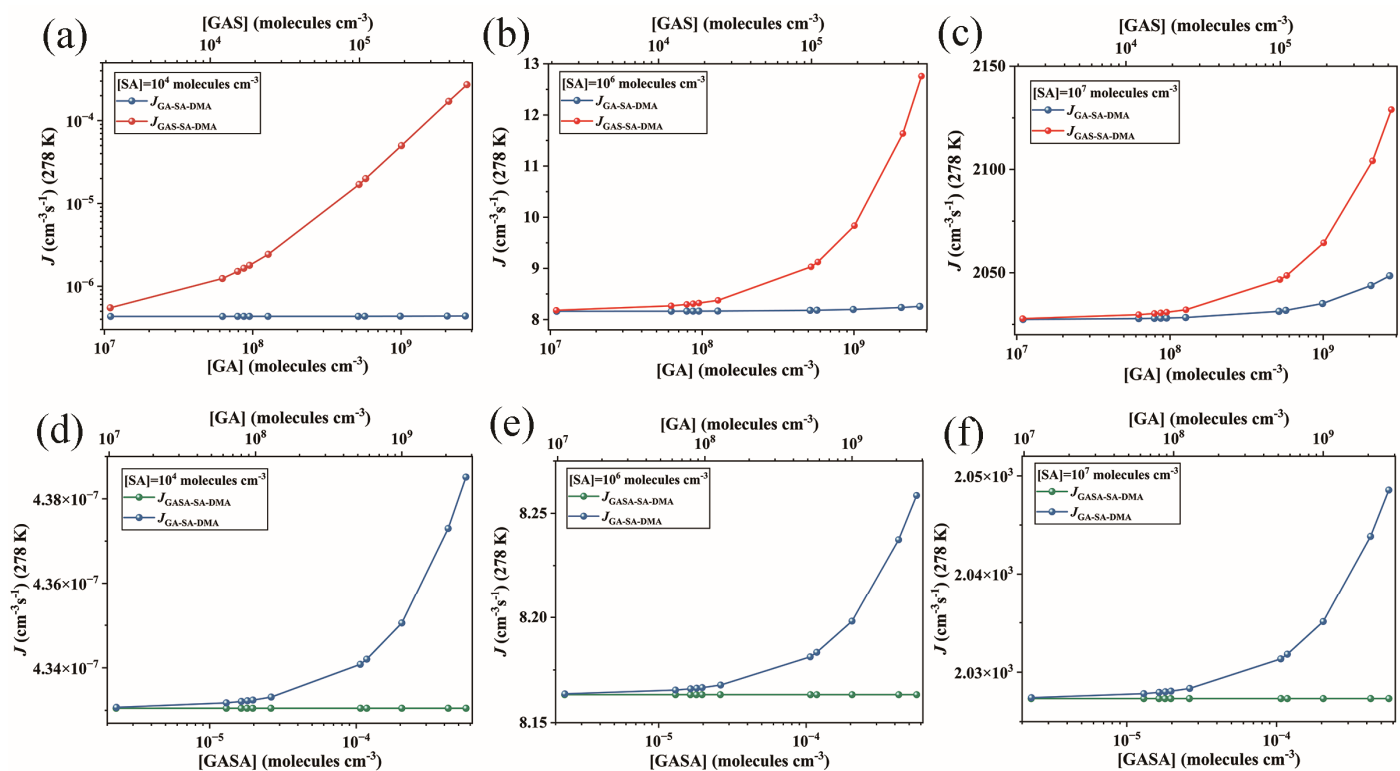

137

138 Figure S6. Simulated cluster formation rates  $J$  ( $\text{cm}^{-3}\text{s}^{-1}$ ) as a function of monomer concentrations ([GA], [GAS],  
 139 and [GASA], respectively) under different [SA] (a) (d)  $[SA] = 10^4$ , (b) (e)  $[SA] = 10^6$ , and (c) (f)  $[SA] = 10^7$   
 140 molecules  $\text{cm}^{-3}$  at 278 K,  $[DMA] = 10^8$  molecules  $\text{cm}^{-3}$ .

141

# Supporting information

[GAS] =  $10^5$ , [DMA] =  $10^8$ , [SA] =  $10^5$  molecules  $\text{cm}^3$ , 278 K

(a)

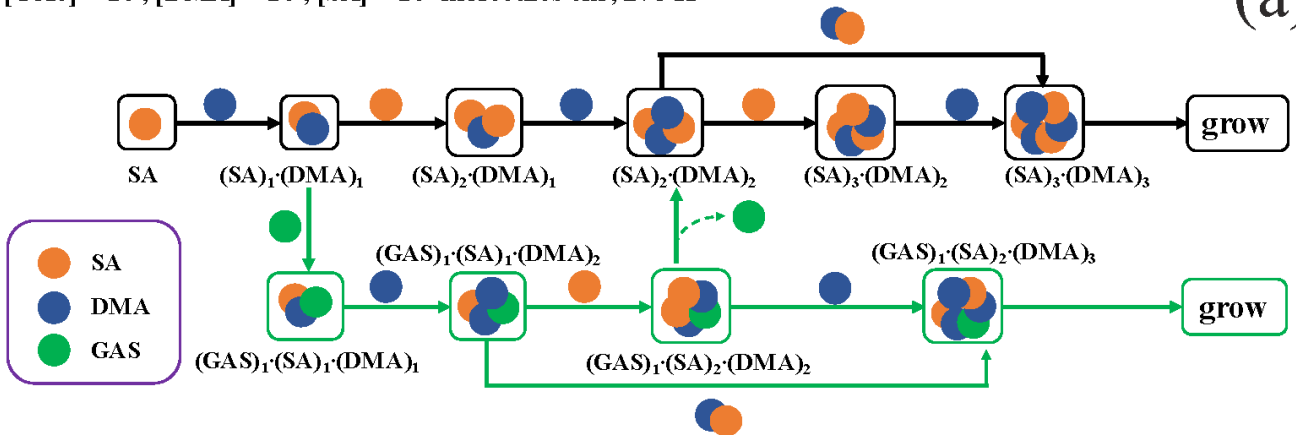

[GA] =  $10^9$ , [DMA] =  $10^8$ , [SA] =  $10^5$  molecules  $\text{cm}^3$ , 278 K

(b)

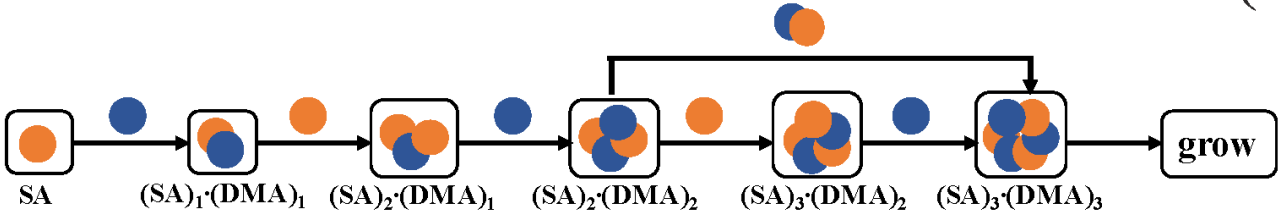

[GA] =  $10^{10}$ , [DMA] =  $10^8$ , [SA] =  $10^5$  molecules  $\text{cm}^3$ , 278 K

(c)

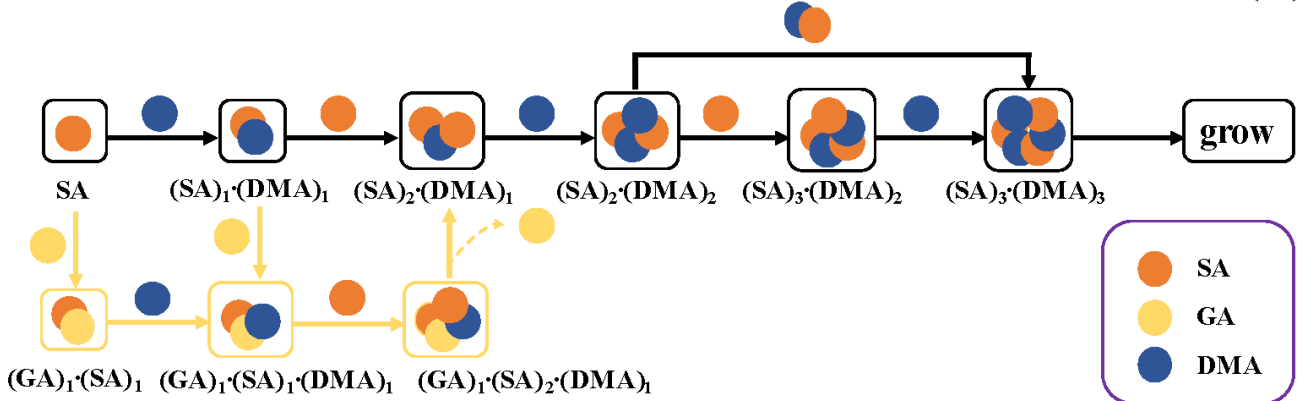

142

143

144

145

146

Figure S7. Main cluster growth pathway of (a) GAS-SA-DMA, and (b) (c) GA-SA-DMA nucleating system at 278 K, [DMA] =  $10^8$ , [SA] =  $10^5$ , [GAS] =  $10^5$  and [GA] =  $10^9$ ,  $10^{10}$  molecules  $\text{cm}^{-3}$ , respectively. The black, green, and light orange arrows refer to the pathways of SA-DMA, GAS-SA-DMA and GA-SA-DMA, respectively.

## Supporting information

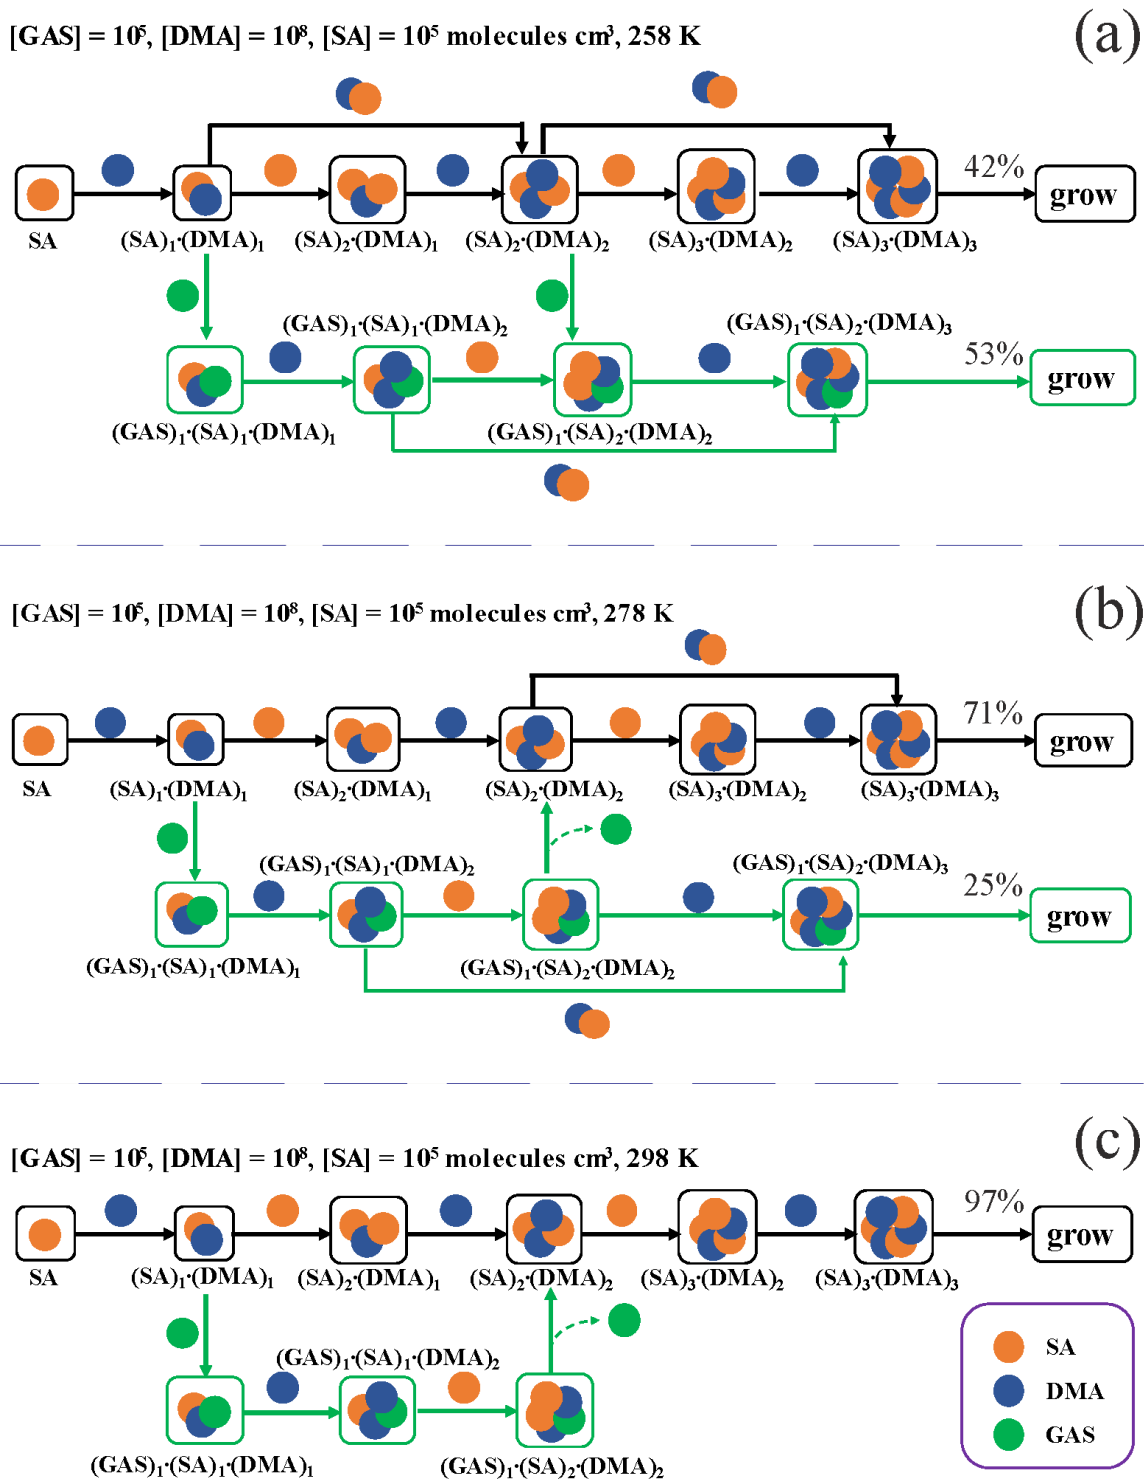

147

148

149

150

151

152

Figure S8. Main cluster growth pathway of GAS-SA-DMA nucleating system at [GAS] =  $10^5$ , [DMA] =  $10^8$ , [SA] =  $10^5$  molecules  $\text{cm}^{-3}$ , and (a) 258 K (b) 278 K (c) 298 K. The black and green arrows refer to the pathways of SA-DMA and GAS-SA-DMA, respectively. For clarity, other pathways that contributes less than 5% to the cluster growing out of the studied system are not shown.

## Supporting information

153 Table S1 Equilibrium constants  $K_{eq}$  for pathway (1)  $(GA + SO_3)_{-OH} \rightarrow GAS$  and pathway (2)  $(GA + SO_3)_{-}$   
154  $COOH \rightarrow GASA$  and possible concentrations of GAS and GASA in the atmosphere, based on the formation  
155 Gibbs free energy ( $\Delta G$ ) at the DLPNO-CCSD(T)/aug-cc-pVTZ//M06-2X/6-311++G(3df,3pd) level of theory  
156 and 278 K, 101.3 KPa.

| Reaction pathways                         | $\Delta G$<br>(kcal mol <sup>-1</sup> ) | [GA]<br>(molecules cm <sup>-3</sup> )      | [SO <sub>3</sub> ]<br>(molecules cm <sup>-3</sup> ) | $K_{eq}$<br>(cm <sup>3</sup> molecule <sup>-1</sup> ) | [C]<br>(molecules cm <sup>-3</sup> )             |
|-------------------------------------------|-----------------------------------------|--------------------------------------------|-----------------------------------------------------|-------------------------------------------------------|--------------------------------------------------|
| $(GA + SO_3)_{-OH} \rightarrow$<br>GAS    | -13.62                                  | $1.11 \times 10^7$ -<br>$2.72 \times 10^9$ | $10^5$                                              | $1.93 \times 10^{-9}$                                 | $2.14 \times 10^3$ -<br>$5.24 \times 10^5$       |
| $(GA + SO_3)_{-COOH} \rightarrow$<br>GASA | -2.21                                   | $1.11 \times 10^7$ -<br>$2.72 \times 10^9$ | $10^5$                                              | $2.07 \times 10^{-18}$                                | $2.30 \times 10^{-6}$ -<br>$5.62 \times 10^{-4}$ |

157

158

## Supporting information

159 Table S2. Calculated Gibbs free energy changes ( $\Delta G$ ) of the formation of heterotrimers consisting of H<sub>2</sub>SO<sub>4</sub>,  
160 base (ammonia/DMA), and GA/GAS/GASA at the temperature of 278 K and pressure of 101.3 KPa.

| clusters      | $\Delta G$ (kcal mol <sup>-1</sup> ) |
|---------------|--------------------------------------|--------------------------------------|--------------------------------------|--------------------------------------|
|               | GA-SA-ammonia <sup>a</sup>           | GA-SA-DMA                            | GAS-SA-DMA                           | GASA-SA-DMA                          |
| Org-base      | -2.74                                | -4.23                                | -7.83                                | -3.06                                |
| Org-SA        | -7.55                                | -7.97                                | -2.58                                | -5.27                                |
| Org-SA-base   | -14.90                               | -23.12                               | -29.90                               | -34.54                               |
| Org-SA-2base  | -16.68                               | -32.66                               | -50.48                               | -52.57                               |
| Org-2SA       | -14.55                               | -11.70                               | -13.58                               | -15.75                               |
| Org-2SA-base  | -28.21                               | -37.71                               | -41.62                               | -40.26                               |
| Org-2SA-2base | -36.81                               | -55.95                               | -65.39                               | -71.31                               |
| Org-2SA-3base | -41.21                               | -67.68                               | -82.56                               | -90.30                               |
| 2Org          | -5.37                                | -5.17                                | -6.68                                | -0.77                                |
| 2Org-base     | -4.33                                | -10.05                               | -18.20                               | -27.65                               |
| 2Org-2base    | -2.35                                | -11.59                               | -50.36                               | -64.19                               |
| 2Org-SA       | -14.87                               | -15.04                               | -16.86                               | -14.54                               |
| 2Org-SA-base  | -19.96                               | -26.48                               | -38.94                               | -44.23                               |
| 2Org-SA-2base | -20.99                               | -39.72                               | -62.20                               | -68.50                               |
| 2Org-SA-3base | -23.42                               | -44.48                               | -76.48                               | -90.80                               |
| 3Org          | -5.24                                | -1.81                                | -7.71                                | -11.82                               |
| 3Org-base     | -6.87                                | -13.61                               | -29.49                               | -40.64                               |
| 3Org-2base    | -6.98                                | -20.11                               | -54.73                               | -69.36                               |
| 3Org-3base    | -3.20                                | -27.43                               | -78.18                               | -98.00                               |

161 <sup>a</sup> The data is from J. Chem. Phys. 146, 184308 (2017) “The enhancement mechanism of glycolic acid on the  
162 formation of atmospheric sulfuric acid–ammonia molecular clusters” calculated at the level of M06-2X/6-  
163 311++G(3df,3pd)//CCSD(T)-F12/VDZ-F12<sup>8</sup>.

## Supporting information

164 Table S3. Evaporation rate coefficients ( $s^{-1}$ ) for simulated evaporation pathways of GA-involved, GAS-  
165 involved and GASA-involved clusters at 278 K and 101.3 KPa obtained by the ACDC simulations.

| Evaporation pathways                                      | Evaporation rate coefficients |
|-----------------------------------------------------------|-------------------------------|
| $(SA)_2 \rightarrow SA + SA$                              | $1.40 \times 10^2$            |
| $(SA)_3 \rightarrow (SA)_2 + SA$                          | $1.01 \times 10^5$            |
| $(SA)_1(DMA)_1 \rightarrow DMA + SA$                      | $7.46 \times 10^{-1}$         |
| $(SA)_2(DMA)_1 \rightarrow (SA)_1(DMA)_1 + SA$            | $3.92 \times 10^{-8}$         |
| $(SA)_2(DMA)_1 \rightarrow DMA + (SA)_2$                  | $9.95 \times 10^{-11}$        |
| $(SA)_3(DMA)_1 \rightarrow (SA)_2(DMA)_1 + SA$            | $7.15 \times 10^{-1}$         |
| $(SA)_3(DMA)_1 \rightarrow (SA)_1(DMA)_1 + (SA)_2$        | $8.07 \times 10^{-11}$        |
| $(SA)_3(DMA)_1 \rightarrow DMA + (SA)_3$                  | $6.80 \times 10^{-16}$        |
| $(SA)_2(DMA)_2 \rightarrow (SA)_2(DMA)_1 + DMA$           | $2.32 \times 10^{-3}$         |
| $(SA)_2(DMA)_2 \rightarrow (SA)_1(DMA)_1 + (SA)_1(DMA)_1$ | $5.15 \times 10^{-11}$        |
| $(SA)_3(DMA)_2 \rightarrow (SA)_2(DMA)_2 + SA$            | $2.11 \times 10^{-4}$         |
| $(SA)_3(DMA)_2 \rightarrow (SA)_3(DMA)_1 + DMA$           | $6.66 \times 10^{-7}$         |
| $(SA)_3(DMA)_2 \rightarrow (SA)_2(DMA)_1 + (SA)_1(DMA)_1$ | $4.78 \times 10^{-7}$         |
| $(SA)_3(DMA)_3 \rightarrow (SA)_3(DMA)_2 + DMA$           | $6.58 \times 10^{-4}$         |
| $(SA)_3(DMA)_3 \rightarrow (SA)_2(DMA)_2 + (SA)_1(DMA)_1$ | $1.24 \times 10^{-7}$         |
| $(SA)_1(GA)_1 \rightarrow GA + SA$                        | $5.09 \times 10^3$            |
| $(SA)_2(GA)_1 \rightarrow (SA)_1(GA)_1 + SA$              | $1.19 \times 10^7$            |
| $(SA)_2(GA)_1 \rightarrow GA + (SA)_2$                    | $1.94 \times 10^8$            |
| $(GA)_2 \rightarrow GA + GA$                              | $4.11 \times 10^5$            |
| $(SA)_1(GA)_2 \rightarrow (GA)_2 + SA$                    | $1.91 \times 10^2$            |
| $(SA)_1(GA)_2 \rightarrow (SA)_1(GA)_1 + GA$              | $2.81 \times 10^4$            |
| $(GA)_3 \rightarrow (GA)_2 + GA$                          | $4.58 \times 10^{12}$         |
| $(GA)_1(DMA)_1 \rightarrow GA + DMA$                      | $6.23 \times 10^6$            |
| $(SA)_1(GA)_1(DMA)_1 \rightarrow (GA)_1(DMA)_1 + SA$      | $1.55 \times 10^{-5}$         |
| $(SA)_1(GA)_1(DMA)_1 \rightarrow (SA)_1(GA)_1 + DMA$      | $1.83 \times 10^{-2}$         |



## Supporting information

---

|                                                                       |                        |
|-----------------------------------------------------------------------|------------------------|
| $(SA)_1(GA)_1(DMA)_1 \rightarrow GA + (SA)_1(DMA)_1$                  | $1.17 \times 10^2$     |
| $(SA)_2(GA)_1(DMA)_1 \rightarrow (SA)_1(GA)_1(DMA)_1 + SA$            | $3.98 \times 10^{-2}$  |
| $(SA)_2(GA)_1(DMA)_1 \rightarrow (GA)_1(DMA)_1 + (SA)_2$              | $1.65 \times 10^{-9}$  |
| $(SA)_2(GA)_1(DMA)_1 \rightarrow (SA)_2(GA)_1 + DMA$                  | $5.91 \times 10^{-11}$ |
| $(SA)_2(GA)_1(DMA)_1 \rightarrow (SA)_1(GA)_1 + (SA)_1(DMA)_1$        | $7.66 \times 10^{-4}$  |
| $(SA)_2(GA)_1(DMA)_1 \rightarrow GA + (SA)_2(DMA)_1$                  | $1.10 \times 10^8$     |
| $(GA)_2(DMA)_1 \rightarrow (GA)_2 + DMA$                              | $2.32 \times 10^6$     |
| $(GA)_2(DMA)_1 \rightarrow (GA)_1(DMA)_1 + GA$                        | $2.90 \times 10^5$     |
| $(SA)_1(GA)_2(DMA)_1 \rightarrow (GA)_2(DMA)_1 + SA$                  | $1.48 \times 10^{-3}$  |
| $(SA)_1(GA)_2(DMA)_1 \rightarrow (SA)_1(GA)_2 + DMA$                  | $1.75 \times 10^1$     |
| $(SA)_1(GA)_2(DMA)_1 \rightarrow (GA)_2 + (SA)_1(DMA)_1$              | $3.38 \times 10^3$     |
| $(SA)_1(GA)_2(DMA)_1 \rightarrow (SA)_1(GA)_1(DMA)_1 + GA$            | $2.59 \times 10^7$     |
| $(SA)_1(GA)_2(DMA)_1 \rightarrow (GA)_1(DMA)_1 + (SA)_1(GA)_1$        | $6.62 \times 10^{-2}$  |
| $(GA)_3(DMA)_1 \rightarrow (GA)_3 + DMA$                              | $9.61 \times 10^0$     |
| $(GA)_3(DMA)_1 \rightarrow (GA)_2(DMA)_1 + GA$                        | $1.83 \times 10^7$     |
| $(GA)_3(DMA)_1 \rightarrow (GA)_1(DMA)_1 + (GA)_2$                    | $5.59 \times 10^6$     |
| $(SA)_1(GA)_1(DMA)_2 \rightarrow (SA)_1(GA)_1(DMA)_1 + DMA$           | $5.40 \times 10^2$     |
| $(SA)_1(GA)_1(DMA)_2 \rightarrow (GA)_1(DMA)_1 + (SA)_1(DMA)_1$       | $8.83 \times 10^{-3}$  |
| $(SA)_2(GA)_1(DMA)_2 \rightarrow (SA)_1(GA)_1(DMA)_2 + SA$            | $6.42 \times 10^{-9}$  |
| $(SA)_2(GA)_1(DMA)_2 \rightarrow (SA)_2(GA)_1(DMA)_1 + (DMA)_1$       | $8.50 \times 10^{-5}$  |
| $(SA)_2(GA)_1(DMA)_2 \rightarrow (SA)_1(GA)_1(DMA)_1 + (SA)_1(DMA)_1$ | $3.21 \times 10^{-6}$  |
| $(SA)_2(GA)_1(DMA)_2 \rightarrow (GA)_1(DMA)_1 + (SA)_2(DMA)_1$       | $1.18 \times 10^{-3}$  |
| $(SA)_2(GA)_1(DMA)_2 \rightarrow GA + (SA)_2(DMA)_2$                  | $3.90 \times 10^6$     |
| $(GA)_2(DMA)_2 \rightarrow (GA)_2(DMA)_1 + DMA$                       | $1.11 \times 10^9$     |
| $(GA)_2(DMA)_2 \rightarrow (GA)_1(DMA)_1 + (GA)_1(DMA)_1$             | $2.11 \times 10^7$     |
| $(SA)_1(GA)_2(DMA)_2 \rightarrow (GA)_2(DMA)_2 + SA$                  | $1.04 \times 10^{-12}$ |
| $(SA)_1(GA)_2(DMA)_2 \rightarrow (SA)_1(GA)_2(DMA)_1 + DMA$           | $7.60 \times 10^{-1}$  |
| $(SA)_1(GA)_2(DMA)_2 \rightarrow (GA)_2(DMA)_1 + (SA)_1(DMA)_1$       | $1.01 \times 10^{-3}$  |
| $(SA)_1(GA)_2(DMA)_2 \rightarrow (SA)_1(GA)_1(DMA)_2 + GA$            | $3.53 \times 10^4$     |

## Supporting information

---

|                                                                       |                        |
|-----------------------------------------------------------------------|------------------------|
| $(SA)_1(GA)_2(DMA)_2 \rightarrow (SA)_1(GA)_1(DMA)_1 + (GA)_1(DMA)_1$ | $2.35 \times 10^0$     |
| $(GA)_3(DMA)_2 \rightarrow (GA)_3(DMA)_1 + DMA$                       | $1.58 \times 10^5$     |
| $(GA)_3(DMA)_2 \rightarrow (GA)_2(DMA)_2 + GA$                        | $2.54 \times 10^3$     |
| $(GA)_3(DMA)_2 \rightarrow (GA)_2(DMA)_1 + (GA)_1(DMA)_1$             | $3.30 \times 10^5$     |
| $(SA)_2(GA)_1(DMA)_3 \rightarrow (SA)_2(GA)_1(DMA)_2 + DMA$           | $1.23 \times 10^1$     |
| $(SA)_2(GA)_1(DMA)_3 \rightarrow (SA)_1(GA)_1(DMA)_2 + (SA)_1(DMA)_1$ | $6.72 \times 10^{-8}$  |
| $(SA)_2(GA)_1(DMA)_3 \rightarrow (GA)_1(DMA)_1 + (SA)_2(DMA)_2$       | $5.45 \times 10^0$     |
| $(SA)_1(GA)_2(DMA)_3 \rightarrow (SA)_1(GA)_2(DMA)_2 + DMA$           | $3.78 \times 10^6$     |
| $(SA)_1(GA)_2(DMA)_3 \rightarrow (GA)_2(DMA)_2 + (SA)_1(DMA)_1$       | $3.19 \times 10^{-6}$  |
| $(SA)_1(GA)_2(DMA)_3 \rightarrow (SA)_1(GA)_1(DMA)_2 + (GA)_1(DMA)_1$ | $1.45 \times 10^4$     |
| $(GA)_3(DMA)_3 \rightarrow (GA)_3(DMA)_2 + DMA$                       | $3.75 \times 10^4$     |
| $(GA)_3(DMA)_3 \rightarrow (GA)_2(DMA)_2 + (GA)_1(DMA)_1$             | $9.97 \times 10^0$     |
| $(SA)_1(GAS)_1 \rightarrow GAS + SA$                                  | $8.70 \times 10^7$     |
| $(SA)_2(GAS)_1 \rightarrow (SA)_1(GAS)_1 + SA$                        | $2.34 \times 10^1$     |
| $(SA)_2(GAS)_1 \rightarrow GAS + (SA)_2$                              | $6.50 \times 10^6$     |
| $(GAS)_2 \rightarrow GAS + GAS$                                       | $2.65 \times 10^4$     |
| $(SA)_1(GAS)_2 \rightarrow (GAS)_2 + SA$                              | $1.08 \times 10^2$     |
| $(SA)_1(GAS)_2 \rightarrow (SA)_1(GAS)_1 + GAS$                       | $5.99 \times 10^{-2}$  |
| $(GAS)_3 \rightarrow (GAS)_2 + GAS$                                   | $1.64 \times 10^9$     |
| $(GAS)_1(DMA)_1 \rightarrow GAS + DMA$                                | $9.21 \times 10^3$     |
| $(SA)_1(GAS)_1(DMA)_1 \rightarrow (GAS)_1(DMA)_1 + SA$                | $4.96 \times 10^{-8}$  |
| $(SA)_1(GAS)_1(DMA)_1 \rightarrow (SA)_1(GAS)_1 + DMA$                | $5.04 \times 10^{-12}$ |
| $(SA)_1(GAS)_1(DMA)_1 \rightarrow GAS + (SA)_1(DMA)_1$                | $5.51 \times 10^{-4}$  |
| $(SA)_2(GAS)_1(DMA)_1 \rightarrow (SA)_1(GAS)_1(DMA)_1 + SA$          | $7.18 \times 10^0$     |
| $(SA)_2(GAS)_1(DMA)_1 \rightarrow (GAS)_1(DMA)_1 + (SA)_2$            | $9.51 \times 10^{-10}$ |
| $(SA)_2(GAS)_1(DMA)_1 \rightarrow (SA)_2(GAS)_1 + DMA$                | $1.50 \times 10^{-12}$ |
| $(SA)_2(GAS)_1(DMA)_1 \rightarrow (SA)_1(GAS)_1 + (SA)_1(DMA)_1$      | $3.81 \times 10^{-11}$ |
| $(SA)_2(GAS)_1(DMA)_1 \rightarrow GAS + (SA)_2(DMA)_1$                | $9.37 \times 10^4$     |
| $(GAS)_2(DMA)_1 \rightarrow (GAS)_2 + DMA$                            | $1.42 \times 10^1$     |

## Supporting information

---

|                                                                                                                                  |                        |
|----------------------------------------------------------------------------------------------------------------------------------|------------------------|
| $(\text{GAS})_2(\text{DMA})_1 \rightarrow (\text{GAS})_1(\text{DMA})_1 + \text{GAS}$                                             | $7.72 \times 10^1$     |
| $(\text{SA})_1(\text{GAS})_2(\text{DMA})_1 \rightarrow (\text{GAS})_2(\text{DMA})_1 + \text{SA}$                                 | $6.08 \times 10^{-7}$  |
| $(\text{SA})_1(\text{GAS})_2(\text{DMA})_1 \rightarrow (\text{SA})_1(\text{GAS})_2 + \text{DMA}$                                 | $7.76 \times 10^{-8}$  |
| $(\text{SA})_1(\text{GAS})_2(\text{DMA})_1 \rightarrow (\text{GAS})_2 + (\text{SA})_1(\text{DMA})_1$                             | $8.48 \times 10^{-6}$  |
| $(\text{SA})_1(\text{GAS})_2(\text{DMA})_1 \rightarrow (\text{SA})_1(\text{GAS})_1(\text{DMA})_1 + \text{GAS}$                   | $8.86 \times 10^2$     |
| $(\text{SA})_1(\text{GAS})_2(\text{DMA})_1 \rightarrow (\text{GAS})_1(\text{DMA})_1 + (\text{SA})_1(\text{GAS})_1$               | $4.24 \times 10^{-13}$ |
| $(\text{GAS})_3(\text{DMA})_1 \rightarrow (\text{GAS})_3 + \text{DMA}$                                                           | $1.39 \times 10^{-7}$  |
| $(\text{GAS})_3(\text{DMA})_1 \rightarrow (\text{GAS})_2(\text{DMA})_1 + \text{GAS}$                                             | $1.55 \times 10^1$     |
| $(\text{GAS})_3(\text{DMA})_1 \rightarrow (\text{GAS})_1(\text{DMA})_1 + (\text{GAS})_2$                                         | $1.95 \times 10^{-2}$  |
| $(\text{SA})_1(\text{GAS})_1(\text{DMA})_2 \rightarrow (\text{SA})_1(\text{GAS})_1(\text{DMA})_1 + \text{DMA}$                   | $1.13 \times 10^{-6}$  |
| $(\text{SA})_1(\text{GAS})_1(\text{DMA})_2 \rightarrow (\text{GAS})_1(\text{DMA})_1 + (\text{SA})_1(\text{DMA})_1$               | $5.90 \times 10^{-14}$ |
| $(\text{SA})_2(\text{GAS})_1(\text{DMA})_2 \rightarrow (\text{SA})_1(\text{GAS})_1(\text{DMA})_2 + \text{SA}$                    | $2.47 \times 10^{-2}$  |
| $(\text{SA})_2(\text{GAS})_1(\text{DMA})_2 \rightarrow (\text{SA})_2(\text{GAS})_1(\text{DMA})_1 + \text{DMA}$                   | $3.80 \times 10^{-9}$  |
| $(\text{SA})_2(\text{GAS})_1(\text{DMA})_2 \rightarrow (\text{SA})_1(\text{GAS})_1(\text{DMA})_1 + (\text{SA})_1(\text{DMA})_1$  | $2.58 \times 10^{-8}$  |
| $(\text{SA})_2(\text{GAS})_1(\text{DMA})_2 \rightarrow (\text{GAS})_1(\text{DMA})_1 + (\text{SA})_2(\text{DMA})_1$               | $3.04 \times 10^{-8}$  |
| $(\text{SA})_2(\text{GAS})_1(\text{DMA})_2 \rightarrow \text{GAS} + (\text{SA})_2(\text{DMA})_2$                                 | $1.48 \times 10^{-1}$  |
| $(\text{GAS})_2(\text{DMA})_2 \rightarrow (\text{GAS})_2(\text{DMA})_1 + \text{DMA}$                                             | $9.33 \times 10^{-16}$ |
| $(\text{GAS})_2(\text{DMA})_2 \rightarrow (\text{GAS})_1(\text{DMA})_1 + (\text{GAS})_1(\text{DMA})_1$                           | $3.20 \times 10^{-18}$ |
| $(\text{SA})_1(\text{GAS})_2(\text{DMA})_2 \rightarrow (\text{GAS})_2(\text{DMA})_2 + \text{SA}$                                 | $6.61 \times 10^0$     |
| $(\text{SA})_1(\text{GAS})_2(\text{DMA})_2 \rightarrow (\text{SA})_1(\text{GAS})_2(\text{DMA})_1 + \text{DMA}$                   | $9.94 \times 10^{-9}$  |
| $(\text{SA})_1(\text{GAS})_2(\text{DMA})_2 \rightarrow (\text{GAS})_2(\text{DMA})_1 + (\text{SA})_1(\text{DMA})_1$               | $5.42 \times 10^{-15}$ |
| $(\text{SA})_1(\text{GAS})_2(\text{DMA})_2 \rightarrow (\text{SA})_1(\text{GAS})_1(\text{DMA})_2 + \text{GAS}$                   | $7.56 \times 10^0$     |
| $(\text{SA})_1(\text{GAS})_2(\text{DMA})_2 \rightarrow (\text{SA})_1(\text{GAS})_1(\text{DMA})_1 + (\text{GAS})_1(\text{DMA})_1$ | $7.13 \times 10^{-10}$ |
| $(\text{GAS})_3(\text{DMA})_2 \rightarrow (\text{GAS})_3(\text{DMA})_1 + \text{DMA}$                                             | $2.85 \times 10^{-10}$ |
| $(\text{GAS})_3(\text{DMA})_2 \rightarrow (\text{GAS})_2(\text{DMA})_2 + \text{GAS}$                                             | $4.62 \times 10^6$     |
| $(\text{GAS})_3(\text{DMA})_2 \rightarrow (\text{GAS})_2(\text{DMA})_1 + (\text{GAS})_1(\text{DMA})_1$                           | $3.24 \times 10^{-13}$ |
| $(\text{SA})_2(\text{GAS})_1(\text{DMA})_3 \rightarrow (\text{SA})_2(\text{GAS})_1(\text{DMA})_2 + \text{DMA}$                   | $6.38 \times 10^{-4}$  |
| $(\text{SA})_2(\text{GAS})_1(\text{DMA})_3 \rightarrow (\text{SA})_1(\text{GAS})_1(\text{DMA})_2 + (\text{SA})_1(\text{DMA})_1$  | $1.34 \times 10^{-5}$  |
| $(\text{SA})_2(\text{GAS})_1(\text{DMA})_3 \rightarrow (\text{GAS})_1(\text{DMA})_1 + (\text{SA})_2(\text{DMA})_2$               | $7.27 \times 10^{-9}$  |

## Supporting information

---

|                                                                          |                        |
|--------------------------------------------------------------------------|------------------------|
| $(SA)_1(GAS)_2(DMA)_3 \rightarrow (SA)_1(GAS)_2(DMA)_2 + DMA$            | $1.23 \times 10^{-1}$  |
| $(SA)_1(GAS)_2(DMA)_3 \rightarrow (GAS)_2(DMA)_2 + (SA)_1(DMA)_1$        | $6.65 \times 10^{-1}$  |
| $(SA)_1(GAS)_2(DMA)_3 \rightarrow (SA)_1(GAS)_1(DMA)_2 + (GAS)_1(DMA)_1$ | $6.86 \times 10^{-5}$  |
| $(GAS)_3(DMA)_3 \rightarrow (GAS)_3(DMA)_2 + DMA$                        | $7.91 \times 10^{-9}$  |
| $(GAS)_3(DMA)_3 \rightarrow (GAS)_2(DMA)_2 + (GAS)_1(DMA)_1$             | $2.58 \times 10^{-6}$  |
| $(SA)_1(GASA)_1 \rightarrow GASA + SA$                                   | $6.74 \times 10^5$     |
| $(SA)_2(GASA)_1 \rightarrow (SA)_1(GASA)_1 + SA$                         | $5.89 \times 10^1$     |
| $(SA)_2(GASA)_1 \rightarrow GASA + (SA)_2$                               | $1.27 \times 10^5$     |
| $(GASA)_2 \rightarrow GASA + GASA$                                       | $1.19 \times 10^9$     |
| $(SA)_1(GASA)_2 \rightarrow (GASA)_2 + SA$                               | $1.62 \times 10^{-1}$  |
| $(SA)_1(GASA)_2 \rightarrow (SA)_1(GASA)_1 + GASA$                       | $5.20 \times 10^2$     |
| $(GASA)_3 \rightarrow (GASA)_2 + GASA$                                   | $2.17 \times 10^1$     |
| $(GASA)_1(DMA)_1 \rightarrow GASA + DMA$                                 | $5.14 \times 10^7$     |
| $(SA)_1(GASA)_1(DMA)_1 \rightarrow (GASA)_1(DMA)_1 + SA$                 | $1.99 \times 10^{-15}$ |
| $(SA)_1(GASA)_1(DMA)_1 \rightarrow (SA)_1(GASA)_1 + DMA$                 | $1.46 \times 10^{-13}$ |
| $(SA)_1(GASA)_1(DMA)_1 \rightarrow GASA + (SA)_1(DMA)_1$                 | $1.23 \times 10^{-7}$  |
| $(SA)_2(GASA)_1(DMA)_1 \rightarrow (SA)_1(GASA)_1(DMA)_1 + SA$           | $3.77 \times 10^5$     |
| $(SA)_2(GASA)_1(DMA)_1 \rightarrow (GASA)_1(DMA)_1 + (SA)_2$             | $2.00 \times 10^{-12}$ |
| $(SA)_2(GASA)_1(DMA)_1 \rightarrow (SA)_2(GASA)_1 + DMA$                 | $9.05 \times 10^{-10}$ |
| $(SA)_2(GASA)_1(DMA)_1 \rightarrow (SA)_1(GASA)_1 + (SA)_1(DMA)_1$       | $5.78 \times 10^{-8}$  |
| $(SA)_2(GASA)_1(DMA)_1 \rightarrow GASA + (SA)_2(DMA)_1$                 | $1.10 \times 10^6$     |
| $(GASA)_2(DMA)_1 \rightarrow (GASA)_2 + DMA$                             | $1.16 \times 10^{-11}$ |
| $(GASA)_2(DMA)_1 \rightarrow (GASA)_1(DMA)_1 + GASA$                     | $5.09 \times 10^{-10}$ |
| $(SA)_1(GASA)_2(DMA)_1 \rightarrow (GASA)_2(DMA)_1 + SA$                 | $1.13 \times 10^{-3}$  |
| $(SA)_1(GASA)_2(DMA)_1 \rightarrow (SA)_1(GASA)_2 + DMA$                 | $7.91 \times 10^{-14}$ |
| $(SA)_1(GASA)_2(DMA)_1 \rightarrow (GASA)_2 + (SA)_1(DMA)_1$             | $1.30 \times 10^{-14}$ |
| $(SA)_1(GASA)_2(DMA)_1 \rightarrow (SA)_1(GASA)_1(DMA)_1 + GASA$         | $2.71 \times 10^2$     |
| $(SA)_1(GASA)_2(DMA)_1 \rightarrow (GASA)_1(DMA)_1 + (SA)_1(GASA)_1$     | $6.7 \times 10^{-19}$  |
| $(GASA)_3(DMA)_1 \rightarrow (GASA)_3 + DMA$                             | $4.00 \times 10^{-13}$ |

## Supporting information

---

|                                                                             |                        |
|-----------------------------------------------------------------------------|------------------------|
| $(GASA)_3(DMA)_1 \rightarrow (GASA)_2(DMA)_1 + GASA$                        | $7.19 \times 10^{-1}$  |
| $(GASA)_3(DMA)_1 \rightarrow (GASA)_1(DMA)_1 + (GASA)_2$                    | $1.33 \times 10^{-19}$ |
| $(SA)_1(GASA)_1(DMA)_2 \rightarrow (SA)_1(GASA)_1(DMA)_1 + DMA$             | $1.14 \times 10^{-4}$  |
| $(SA)_1(GASA)_1(DMA)_2 \rightarrow (GASA)_1(DMA)_1 + (SA)_1(DMA)_1$         | $2.38 \times 10^{-19}$ |
| $(SA)_2(GASA)_1(DMA)_2 \rightarrow (SA)_1(GASA)_1(DMA)_2 + SA$              | $2.44 \times 10^{-5}$  |
| $(SA)_2(GASA)_1(DMA)_2 \rightarrow (SA)_2(GASA)_1(DMA)_1 + DMA$             | $7.19 \times 10^{-15}$ |
| $(SA)_2(GASA)_1(DMA)_2 \rightarrow (SA)_1(GASA)_1(DMA)_1 + (SA)_1(DMA)_1$   | $2.57 \times 10^{-9}$  |
| $(SA)_2(GASA)_1(DMA)_2 \rightarrow (GASA)_1(DMA)_1 + (SA)_2(DMA)_1$         | $1.21 \times 10^{-16}$ |
| $(SA)_2(GASA)_1(DMA)_2 \rightarrow GASA + (SA)_2(DMA)_2$                    | $3.30 \times 10^{-6}$  |
| $(GASA)_2(DMA)_2 \rightarrow (GASA)_2(DMA)_1 + DMA$                         | $3.38 \times 10^{-19}$ |
| $(GASA)_2(DMA)_2 \rightarrow (GASA)_1(DMA)_1 + (GASA)_1(DMA)_1$             | $1.37 \times 10^{-36}$ |
| $(SA)_1(GASA)_2(DMA)_2 \rightarrow (GASA)_2(DMA)_2 + SA$                    | $5.51 \times 10^6$     |
| $(SA)_1(GASA)_2(DMA)_2 \rightarrow (SA)_1(GASA)_2(DMA)_1 + DMA$             | $1.62 \times 10^{-9}$  |
| $(SA)_1(GASA)_2(DMA)_2 \rightarrow (GASA)_2(DMA)_1 + (SA)_1(DMA)_1$         | $1.64 \times 10^{-12}$ |
| $(SA)_1(GASA)_2(DMA)_2 \rightarrow (SA)_1(GASA)_1(DMA)_2 + GASA$            | $3.73 \times 10^{-3}$  |
| $(SA)_1(GASA)_2(DMA)_2 \rightarrow (SA)_1(GASA)_1(DMA)_1 + (GASA)_1(DMA)_1$ | $6.35 \times 10^{-15}$ |
| $(GASA)_3(DMA)_2 \rightarrow (GASA)_3(DMA)_1 + DMA$                         | $5.28 \times 10^{-13}$ |
| $(GASA)_3(DMA)_2 \rightarrow (GASA)_2(DMA)_2 + GASA$                        | $1.09 \times 10^6$     |
| $(GASA)_3(DMA)_2 \rightarrow (GASA)_2(DMA)_1 + (GASA)_1(DMA)_1$             | $5.25 \times 10^{-21}$ |
| $(SA)_2(GASA)_1(DMA)_3 \rightarrow (SA)_2(GASA)_1(DMA)_2 + DMA$             | $2.38 \times 10^{-5}$  |
| $(SA)_2(GASA)_1(DMA)_3 \rightarrow (SA)_1(GASA)_1(DMA)_2 + (SA)_1(DMA)_1$   | $4.92 \times 10^{-10}$ |
| $(SA)_2(GASA)_1(DMA)_3 \rightarrow (GASA)_1(DMA)_1 + (SA)_2(DMA)_2$         | $1.08 \times 10^{-18}$ |
| $(SA)_1(GASA)_2(DMA)_3 \rightarrow (SA)_1(GASA)_2(DMA)_2 + DMA$             | $6.15 \times 10^{-8}$  |
| $(SA)_1(GASA)_2(DMA)_3 \rightarrow (GASA)_2(DMA)_2 + (SA)_1(DMA)_1$         | $2.76 \times 10^{-1}$  |
| $(SA)_1(GASA)_2(DMA)_3 \rightarrow (SA)_1(GASA)_1(DMA)_2 + (GASA)_1(DMA)_1$ | $3.02 \times 10^{-18}$ |
| $(GASA)_3(DMA)_3 \rightarrow (GASA)_3(DMA)_2 + DMA$                         | $6.62 \times 10^{-13}$ |
| $(GASA)_3(DMA)_3 \rightarrow (GASA)_2(DMA)_2 + (GASA)_1(DMA)_1$             | $9.16 \times 10^{-15}$ |

---

## Supporting information

---

### Reference

- (1) Mochizuki, T.; Kawamura, K.; Miyazaki, Y.; Kunwar, B.; Boreddy, S. K. R., Distributions and Sources of Low-molecular-weight Monocarboxylic Acids in Gas and Particles from a Deciduous Broadleaf Forest in Northern Japan. *Atmos. Chem. Phys.* **2019**, *19* (4), 2421-2432.
- (2) Miyazaki, Y.; Sawano, M.; Kawamura, K., Low-molecular-weight Hydroxyacids in Marine Atmospheric Aerosol: Evidence of a Marine Microbial Origin. *Biogeosciences* **2014**, *11* (16), 4407-4414.
- (3) Stieger, B.; van Pinxteren, D.; Tilgner, A.; Spindler, G.; Poulain, L.; Grüner, A.; Wallasch, M.; Herrmann, H., Strong Deviations from Thermodynamically Expected Phase Partitioning of Low-Molecular-Weight Organic Acids during One Year of Rural Measurements. *ACS Earth Space Chem.* **2021**, *5* (3), 500-515.
- (4) Mochizuki, T.; Kawamura, K.; Nakamura, S.; Kanaya, Y.; Wang, Z., Enhanced Levels of Atmospheric Low-molecular Weight Monocarboxylic Acids in Gas and Particulates over Mt. Tai, North China, during Field Burning of Agricultural Wastes. *Atmos. Environ.* **2017**, *171*, 237-247.
- (5) Liu, L.; Yu, F.; Du, L.; Yang, Z.; Francisco, J. S.; Zhang, X., Rapid Sulfuric Acid–Dimethylamine Nucleation Enhanced by Nitric Acid in Polluted Regions. *Proc. Natl. Acad. Sci. U.S.A.* **2021**, *118* (35), e2108384118.
- (6) Tan, S.; Zhang, X.; Lian, Y.; Chen, X.; Yin, S.; Du, L.; Ge, M., OH Group Orientation Leads to Organosulfate Formation at the Liquid Aerosol Surface. *J. Am. Chem. Soc.* **2022**, *144* (37), 16953-16964.
- (7) Renard, J. J.; Calidonna, S. E.; Henley, M. V., Fate of ammonia in the atmosphere—a review for applicability to hazardous releases. *J. Hazard. Mater.* **2004**, *108*, (1), 29-60.
- (8) Zhang, H.; Kupiainen-Määttä, O.; Zhang, X.; Molinero, V.; Zhang, Y.; Li, Z., The Enhancement Mechanism of Glycolic Acid on the Formation of Atmospheric Sulfuric Acid–ammonia Molecular Clusters. *J. Chem. Phys.* **2017**, *146* (18), 184308.
